# Supplementary material for: Metabolic Signatures of Cardiac Dysfunction, Multimorbidity, and Post–Transcatheter Aortic Valve Implantation Death
Source: PubMed Central journal article supplement — J Am Heart Assoc. 2023 Jun 22;12(13):e029542. doi: 10.1161/JAHA.123.029542 (PMC10356077; doi:10.1161/jaha.123.029542), 2023-06-22
Supplement: JAH3-12-e029542-s001.pdf [file JAH3-12-e029542-s001.pdf]

# **SUPPLEMENTAL MATERIAL**

## **Supplemental Methods**

### **Data S1. List of Enrolling Centers**

Barnes-Jewish Hospital, St. Louis, MO

Cleveland Clinic Foundation, Cleveland, OH

Dartmouth-Hitchcock Medical Center, Lebanon, NH

Intermountain Heart Institute, Murray, UT

Massachusetts General Hospital, Boston, MA

Morristown Medical Center, Morristown, NJ

Stanford Medical Center, Palo Alto, CA

University of Texas Southwestern Medical Center, Dallas, TX

University of Utah Hospital, Salt Lake City, UT

Vanderbilt University Medical Center, Nashville, TN

## Data S2.

### Metabolite profiling using liquid chromatography-mass spectrometry.

Methods for metabolite quantification were reproduced directly from other work to enhance rigor and reproducibility

(<https://www.patentsencyclopedia.com/app/20080261317>; Date Accessed 1 May 2023)<sup>50</sup>. Venous blood was processed within 30 minutes of collection and stored at -80°C.

Amino acids and amines, sugars and ribonucleotides, and organic acids were separated by liquid chromatography. Columns were connected in parallel with an automated switching valve on a robotic sample loader (Leap Technologies). A triple-quadrupole mass spectrometer (API4000, Applied Biosystem/ Sciex) operated in automated switching polarity mode with a turbo ion spray LC-MS interface under selected reaction monitoring conditions. Either positive or negative ions were selected for targeted tandem mass spectrometry (MS/MS) analysis using selective reaction conditions. Quantification was performed by integrating peak areas for parent/daughter ion pairs. Metabolite concentrations  $\leq 0$  were treated as missing (0.001%). We excluded metabolites with  $\geq 10\%$  missingness (4/225), and imputed missing values for any metabolite with  $< 10\%$  missingness by half of the minimum value detected for that metabolite (0.1% of metabolite measurements). Two subjects had metabolite quantification duplicated, we used the mean concentration for these subjects in analysis.

### **Principal components analysis to summarize echocardiographic data into 3 axes**

**of cardiac structure/function.** Given the relatedness among the different echocardiographic measures (**Figure S2**), we elected to summarize echocardiographic measures into different, related “axes” of remodeling/function using principal components analysis (PCA; with echocardiographic measures log-transformed to reduce skewness and standardized to unit variance). In this unsupervised PCA approach, the relations among phenotypes were used to collapse the 12 echocardiographic measures into 3 composite axes in an unbiased manner (selected based on examination of variance explained on a scree plot). Broadly, the contribution of each of the 12 echocardiographic measures to each of 3 PCs was quantitated as the loading for the PC (**Figure 2A**). Study participants had a score for each of the 3 PCs that summarized the aspect of their cardiac structure/function captured by that PC. Varimax post-rotation for 3 PCs was used to improve interpretability of loadings across PCs. Scores for each participant represented composite axes of cardiac structure/function and used as the dependent variable in subsequent LASSO models, thereby capturing a broad array of related echocardiographic measures to supervise selection of metabolites most closely related to those axes. While we acknowledge there are many different additional approaches that could be used here (e.g., pre-selecting phenotypes and using those for penalized regression, clustering methods, etc.), we felt that this approach would preserve power to develop optimal models for discovery while limiting type 1 error (due to multiple biomarker testing) that may reduce reproducibility.

**Recalibration of LASSO models for use in the single center validation cohort.** Given that the metabolites quantified in the single-center validation cohort did not completely match the metabolites measured in our multi-center cohort, we used the metabolites that overlapped between the single-center validation and the multi-center cohort (78 metabolites) to refit models in the multi-center derivation cohort. In these models, the original metabolite score (based on

the “full” LASSO regressions across all metabolites in derivation) was the dependent variable, and the overlapping metabolites were the independent variables. We used a LASSO model for this recalibration effort to mitigate overfitting, generating coefficients that could be applied to overlapping metabolites in the single-center validation cohort to generate the 3 metabolite scores.

**Table S1: Metabolite Correlation with Echocardiographic Parameters from LASSO**

| Metabolite               | HMDB        | LASSO Coefficient |       |        | Biological Significance                                                                                                 |
|--------------------------|-------------|-------------------|-------|--------|-------------------------------------------------------------------------------------------------------------------------|
|                          |             | PC1               | PC2   | PC3    |                                                                                                                         |
| Phosphocreatine          | HMDB0001511 | -0.084            | -     | -      | Derivative of amino acid creatine. Plays important role in ATP generation for cardiac contraction <sup>51,52</sup> .    |
| Nicotinamide N-Oxide     | HMDB0002730 | -0.087            | -     | -0.014 | Antagonizes CXCR2 which recruits granulocytes <sup>53</sup> .                                                           |
| N-Docosanoyl Taurine     | NA          | 0.072             | -     | -      | Taurine-conjugated fatty acid.                                                                                          |
| Adenine                  | HMDB0000034 | 0.068             | -     | -      | Nucleic acid.                                                                                                           |
| Serine                   | HMDB0000187 | 0.053             | 0.019 | -      | Amino acid.                                                                                                             |
| N-Palmitoyltaurine       | HMDB0240594 | 0.059             | -     | -      | Derivative of hexadecenoic acid (fatty acid).                                                                           |
| Tryptophan               | HMDB0000929 | 0.045             | -     | -      | Amino acid.                                                                                                             |
| N-Acetyl-L-Phenylalanine | HMDB0000512 | 0.052             | -     | -      | Derivative of amino acid phenylalanine.                                                                                 |
| Aconitic acid            | HMDB0000072 | -0.044            | -     | -      | TCA cycle intermediate. Associated with aortic stenosis <sup>54</sup> .                                                 |
| Bilirubin                | HMDB0000054 | 0.043             | -     | -      | Derivative of heme. Associated with mortality among subjects undergoing TAVI <sup>55</sup> .                            |
| C9 acylcarnitine         | HMDB0013288 | 0.045             | -     | -      | Medium chain acylcarnitine.                                                                                             |
| Oleoyl glycine           | HMDB0013631 | -0.038            | -     | -      | Long chain fatty acyl glycine.                                                                                          |
| Creatine                 | HMDB0000064 | -0.039            | 0.051 | 0.036  | Amino acid with role in myocardial contraction <sup>52</sup> .                                                          |
| Phosphocholine           | HMDB0001565 | -0.038            | -     | -      | Product of choline kinase to dephosphorylate ATP.                                                                       |
| 2'-deoxycytidine         | HMDB0000014 | 0.045             | -     | -      | Deoxyribonucleoside.                                                                                                    |
| N-Acetyl-L-Glutamic acid | HMDB0001138 | -0.032            | -     | -      | Derivative of L-glutamic acid.                                                                                          |
| Aspartic acid            | HMDB0000191 | 0.031             | 0.074 | -      | Amino acid.                                                                                                             |
| N-Acetyl-L-Ornithine     | HMDB0003357 | -0.020            | -     | -      | Derivative of amino acids arginine and proline.                                                                         |
| 2-Hydroxybutyric acid    | HMDB0000008 | -0.024            | -     | -      | Organic acid from amino acid metabolism (threonine and methionine). A marker of insulin resistance <sup>56</sup> .      |
| Sarcosine                | HMDB0000271 | -0.020            | -     | -      | Derivative of amino acid glycine.                                                                                       |
| C26 acylcarnitine        | HMDB0002356 | 0.020             | -     | -      | Long chain acylcarnitine. An intermediate of fatty acid metabolism, associated with LV remodeling in AS <sup>12</sup> . |
| Saccharopine             | HMDB0000279 | -0.025            | -     | -      | Derivative of amino acid lysine.                                                                                        |
| Glycocholic acid         | HMDB0000138 | -0.023            | -     | -      | Bile acid conjugate of glycine and choline.                                                                             |
| Kynurenine               | HMDB0000684 | 0.033             | -     | -      | Metabolite of tryptophan (amino acid) that has been                                                                     |

|                                    |                       |        |        |   |                                                                                                                                                           |
|------------------------------------|-----------------------|--------|--------|---|-----------------------------------------------------------------------------------------------------------------------------------------------------------|
|                                    |                       |        |        |   | shown to suppress immune response <sup>57</sup> . Associated with survival among patients with heart failure <sup>31</sup> .                              |
| Lactic acid                        | HMDB0000190           | -0.030 | -      | - | Organic acid derivative of glucose metabolism. May play a in modulating hypertrophy and heart failure <sup>58</sup> .                                     |
| Choline                            | HMDB0000097           | 0.013  | -      | - | Associated with cardiovascular disease <sup>36,59</sup> . Associated with LV remodeling in AS <sup>12</sup> .                                             |
| DDHAP / Glyceraldehyde 3-phosphate | HMDB0001112           | -0.019 | -0.037 | - | Derivative of glucose metabolism.                                                                                                                         |
| DiHOME                             | HMDB0004705           | -0.018 | -      | - | Linoleic acid metabolite. Increases fatty acid uptake in skeletal muscle <sup>60</sup> .                                                                  |
| Dihomo-γ-Linolenoyl Ethanolamide   | HMDB0013625           | 0.020  | 0.008  | - | Endocannabinoid.                                                                                                                                          |
| Uracil                             | HMDB0000300           | -0.008 | -      | - | Nucleobase of RNA. May play a role in cardiac hypertrophy <sup>30</sup> .                                                                                 |
| Glucose/Fructose/Galactose         | HMDB0000122 (glucose) | -0.022 | -      | - | Monosaccharides.                                                                                                                                          |
| Cystine                            | HMDB0000192           | -0.010 | -      | - | Amino acid. Associated with diastolic dysfunction <sup>61</sup> .                                                                                         |
| Glycochenodeoxycholic acid         | HMDB0304944           | -0.003 | -      | - | Bile salt.                                                                                                                                                |
| N-carbomoyl-beta-alanine           | HMDB0000026           | 0.009  | -0.028 | - | Derivative of amino acid uracil.                                                                                                                          |
| C18.2 carnitine                    | HMDB0006469           | 0.017  | -      | - | An intermediate of fatty acid metabolism, associated with LV remodeling in AS <sup>12</sup> . Related to coronary artery disease <sup>33</sup> .          |
| Histamine                          | HMDB0000870           | -0.001 | -      | - | Imidazole. May play a role in the development of heart failure and cardiac fibrosis after MI <sup>62,63</sup> .                                           |
| Cyclic AMP                         | HMDB0000058           | -0.007 | -      | - | Derivative of adenosine triphosphate used in intracellular signaling for a variety of pathways.                                                           |
| Anserine                           | HMDB0000194           | -0.004 | -      | - | A dipeptide derivative of carnosine.                                                                                                                      |
| Cytidine                           | HMDB0000089           | 0.003  | -      | - | Nucleoside component of RNA.                                                                                                                              |
| α-Ketoglutaric acid                | HMDB0000208           | -      | -0.100 | - | TCA cycle intermediate. In a murine model, supplementation lessened pressure-overload cardiac hypertrophy and preserved systolic function <sup>35</sup> . |
| Beta-alanine                       | HMDB0000056           | -      | -0.086 | - | Amino acid. Supplementation shown to improve response to strength training in humans <sup>64</sup> and functional capacity                                |

|                             |                       |   |        |       |                                                                                                                                                                                                                                                                                                   |
|-----------------------------|-----------------------|---|--------|-------|---------------------------------------------------------------------------------------------------------------------------------------------------------------------------------------------------------------------------------------------------------------------------------------------------|
|                             |                       |   |        |       | in a murine model of heart failure <sup>65</sup> .                                                                                                                                                                                                                                                |
| Glutamate                   | HMDB0000148           | - | -0.059 | -     | Amino acid and a common neurotransmitter. Used in some formulations of cardioplegia due to possible improvements in outcomes <sup>66</sup> . Shown to reduce oxidative injury in a murine model of myocardial infarction <sup>67</sup> . Associated with increased risk of stroke <sup>68</sup> . |
| Uridine                     | HMDB0000296           | - | 0.058  | -     | Nucleic acid. Supplementation reduced ischemic reperfusion injury in a murine model <sup>69</sup> . Associated with incident heart failure in the Jackson Heart Study <sup>36</sup> .                                                                                                             |
| Uridine (anode)             | HMDB0000296           | - | 0.018  | -     |                                                                                                                                                                                                                                                                                                   |
| Arginine                    | HMDB0000517           | - | 0.052  | -     | Amino acid and precursor of nitric oxide in the vascular endothelium. Supplementation in subjects with ischemic heart failure had improved function and dimensions <sup>70</sup> .                                                                                                                |
| Glycine                     | HMDB0000123           | - | 0.057  | -     | Amino acid. Elevated in subjects with severe heart failure <sup>71</sup> . Glycine metabolism is different after exercise in subjects with hypertrophic cardiomyopathy <sup>72</sup> .                                                                                                            |
| UDP-glucose / UDP-galactose | HMDB0000286 (glucose) | - | -0.050 | -     | Nucleotide sugar. Involved in carbohydrate metabolism. Implicated as a coronary vasoconstrictor <sup>73</sup> .                                                                                                                                                                                   |
| Spermidine                  | HMDB0001257           | - | -0.046 | -     | Polyamine. Elevated in murine models of pressure overload and infarct hearts <sup>74</sup> . May be helpful in prognosticating outcomes in heart failure <sup>28</sup> .                                                                                                                          |
| 2-aminoadipic acid          | HMDB0302754           | - | -0.031 | -     | Product of lysine metabolism. Associated with incident heart failure in the Jackson Heart Study <sup>36</sup> and development of T2DM <sup>75</sup> and atherosclerosis <sup>76</sup> .                                                                                                           |
| N-oleoyl dopamine           | HMDB0255218           | - | 0.020  | -     | Fatty amide. Protective against ischemia-reperfusion injury <sup>34</sup> .                                                                                                                                                                                                                       |
| Tyrosine                    | HMDB0000158           | - | -0.023 | -     | Amino acid. A disorder of tyrosine catabolism, alkaptonuria, is associated with aortic stenosis <sup>77</sup> .                                                                                                                                                                                   |
| N-Carbamoyl-BAIBA           | NA                    | - | -      | 0.102 | Product of thymine catabolism                                                                                                                                                                                                                                                                     |
| S-adenosyl-L-homocysteine   | HMDB0000939           | - | -      | 0.076 | Sole metabolic precursor to homocysteine and a derivative of amino acids methionine and                                                                                                                                                                                                           |



|                                   |             |   |   |        |                                                                                                                                                              |
|-----------------------------------|-------------|---|---|--------|--------------------------------------------------------------------------------------------------------------------------------------------------------------|
|                                   |             |   |   |        | cysteine. Associated with coronary heart disease <sup>32</sup> .                                                                                             |
| 20-Hydroxy N-Arachidonoyl-Taurine | NA          | - | - | 0.012  | Fatty acid amide of amino acid taurine.                                                                                                                      |
| Histidine                         | HMDB0000177 | - | - | -0.069 | Amino acid. Improved functional capacity in a murine model of heart failure <sup>65</sup> .                                                                  |
| N-acetyl-L-methionine             | HMDB0011745 | - | - | 0.055  | Derivative of amino acid methionine. May be helpful in reducing ischemia-reperfusion injury <sup>78</sup> .                                                  |
| Valine                            | HMDB0000883 | - | - | -0.044 | Branched chain amino acid. Defective metabolism may be implicated in heart failure pathogenesis <sup>21</sup> and cardiac insulin resistance <sup>79</sup> . |
| Oxaloacetic acid                  | HMDB0000223 | - | - | 0.028  | Organic acid involved in numerous metabolic pathways.                                                                                                        |
| Leucine                           | HMDB0000687 | - | - | -0.006 | Branched chain amino acid. Defective metabolism may be implicated in heart failure pathogenesis <sup>21</sup> and cardiac insulin resistance <sup>79</sup> . |
| Malic acid                        | HMDB0000156 | - | - | 0.004  | TCA cycle intermediate. Associated with atrial fibrillation and heart failure <sup>80</sup> . Reduced ischemia reperfusion injury in mice <sup>81</sup> .    |

ATP = adenosine triphosphate; CXCR2 = chemokine (CXC motif) receptor 2; TCA = tricarboxylic acid; TAVI = transcatheter aortic valve implantation; LV = left ventricular; AS = aortic stenosis; RNA = Ribonucleic acid; MI = myocardial infarction; T2DM = type 2 diabetes mellitus.

**Table S2:** Spearman correlation between phenotype scores, metabolite scores, select echocardiographic variables (exemplary of each PC-based phenotype category), and multi-morbidity measures from the multi-center derivation cohort. N represents the number of observations on which the correlation is based (not all individuals had every measure). The P-value reported is the nominal P-value for the correlation, **Figure 4** in the manuscript uses an asterisk to indicate which P-values passed a false discovery rate of 5% (Benjamini-Hochberg). Of note, phenotype scores were not calculated in the multi-center validation cohort due to incomplete echocardiographic data (see **Table 1**). eGFR = estimate glomerular filtration rate, FEV1 = Forced expiratory volume in the first second; PC = principal component; LVEDVI = left ventricular end-diastolic volume index; LVEF = left ventricular ejection fraction.

| <b>Correlation coefficient</b>                                    |        |                    |        |        |                    |        |        |                    |              |
|-------------------------------------------------------------------|--------|--------------------|--------|--------|--------------------|--------|--------|--------------------|--------------|
|                                                                   | PC1    | Metabolite<br>-PC1 | LVEDVI | PC2    | Metabolite<br>-PC2 | LVEF   | PC3    | Metabolite<br>-PC3 | Mean<br>E/e' |
| Age (N=519)                                                       | -0.002 | 0.022              | -0.107 | 0.045  | 0.108              | 0.009  | 0.141  | 0.067              | 0.036        |
| Kansas City Cardiomyopathy<br>Questionnaire summary score (N=487) | -0.033 | -0.044             | -0.038 | 0.167  | 0.236              | 0.130  | -0.222 | -0.286             | -0.169       |
| Average grip strength (N=475)                                     | 0.141  | 0.116              | 0.207  | -0.118 | -0.253             | -0.190 | -0.164 | -0.138             | -0.195       |
| Average gait speed (N=458)                                        | 0.116  | -0.036             | 0.127  | 0.005  | 0.141              | -0.031 | -0.182 | -0.281             | -0.173       |
| Mini-Cog total score (N=484)                                      | -0.024 | 0.013              | 0.023  | -0.037 | -0.006             | -0.031 | -0.102 | -0.051             | -0.030       |
| FEV1, % Predicted (N=410)                                         | -0.103 | -0.166             | -0.121 | 0.204  | 0.256              | 0.218  | -0.085 | -0.157             | -0.082       |
| Hemoglobin (N=516)                                                | -0.059 | -0.147             | -0.083 | -0.142 | -0.088             | -0.033 | -0.216 | -0.359             | -0.242       |
| Platelets (N=515)                                                 | -0.020 | -0.097             | -0.043 | -0.035 | 0.030              | -0.014 | -0.020 | 0.016              | 0.064        |
| Uric Acid (N=504)                                                 | 0.058  | 0.170              | 0.096  | -0.054 | -0.199             | -0.096 | 0.129  | 0.299              | 0.045        |
| eGFR (N=517)                                                      | -0.019 | -0.158             | -0.033 | -0.041 | 0.042              | 0.038  | -0.211 | -0.509             | -0.203       |

| <b>P-value of correlation</b>                          |          |          |          |          |          |          |          |           |          |
|--------------------------------------------------------|----------|----------|----------|----------|----------|----------|----------|-----------|----------|
| Age                                                    | 9.69E-01 | 6.10E-01 | 1.49E-02 | 3.06E-01 | 1.37E-02 | 8.39E-01 | 1.26E-03 | 1.25E-01  | 4.15E-01 |
| Kansas City Cardiomyopathy Questionnaire summary score | 4.63E-01 | 3.36E-01 | 4.01E-01 | 2.16E-04 | 1.45E-07 | 3.94E-03 | 7.58E-07 | 1.22E-10  | 1.80E-04 |
| Average grip strength                                  | 2.04E-03 | 1.11E-02 | 5.49E-06 | 1.04E-02 | 2.35E-08 | 3.02E-05 | 3.18E-04 | 2.67E-03  | 1.83E-05 |
| Average gait speed                                     | 1.30E-02 | 4.37E-01 | 6.37E-03 | 9.15E-01 | 2.48E-03 | 5.04E-01 | 8.95E-05 | 8.67E-10  | 1.95E-04 |
| Mini-Cog total score                                   | 5.92E-01 | 7.72E-01 | 6.09E-01 | 4.18E-01 | 8.94E-01 | 5.02E-01 | 2.44E-02 | 2.62E-01  | 5.05E-01 |
| FEV1, % Predicted                                      | 3.66E-02 | 7.29E-04 | 1.39E-02 | 3.29E-05 | 1.52E-07 | 8.81E-06 | 8.67E-02 | 1.45E-03  | 9.75E-02 |
| Hemoglobin                                             | 1.83E-01 | 7.95E-04 | 5.84E-02 | 1.20E-03 | 4.66E-02 | 4.53E-01 | 7.60E-07 | <2.20E-16 | 2.56E-08 |
| Platelets                                              | 6.43E-01 | 2.76E-02 | 3.31E-01 | 4.24E-01 | 4.90E-01 | 7.53E-01 | 6.45E-01 | 7.10E-01  | 1.45E-01 |
| Uric Acid                                              | 1.97E-01 | 1.26E-04 | 3.07E-02 | 2.25E-01 | 6.94E-06 | 3.18E-02 | 3.82E-03 | 7.08E-12  | 3.17E-01 |
| eGFR                                                   | 6.61E-01 | 3.11E-04 | 4.52E-01 | 3.51E-01 | 3.37E-01 | 3.90E-01 | 1.31E-06 | <2.20E-16 | 3.13E-06 |

**Table S3:** Spearman correlation between phenotype scores, metabolite scores, select echocardiographic variables (exemplary of each PC-based phenotype category), and multi-morbidity measures in the multi-center validation cohort. N represents the number of observations on which the correlation is based (not all individuals had every measure). The P-value reported is the nominal P-value for the correlation, **Figure 4** in the manuscript uses an asterisk to indicate which P-values passed a false discovery rate of 5% (Benjamini-Hochberg). Of note, phenotype scores were not calculated in the multi-center validation cohort due to incomplete echocardiographic data (see **Table 1**). eGFR = estimate glomerular filtration rate, FEV1 = Forced expiratory volume in the first second.

| <b>Correlation coefficient</b>                                 |                |                |                |
|----------------------------------------------------------------|----------------|----------------|----------------|
|                                                                | Metabolite-PC1 | Metabolite-PC2 | Metabolite-PC3 |
| Age (N=286)                                                    | 0.150          | 0.100          | 0.093          |
| Left ventricular ejection fraction (N=260)                     | -0.177         | 0.158          | -0.273         |
| Left ventricular end diastolic volume index (N=120)            | 0.139          | -0.173         | 0.237          |
| Mean E/e' (N=79)                                               | 0.170          | 0.005          | 0.359          |
| Average gait speed (N=226)                                     | -0.065         | 0.151          | -0.316         |
| Average grip strength (N=251)                                  | 0.033          | -0.142         | -0.114         |
| Kansas City Cardiomyopathy Questionnaire summary score (N=267) | -0.017         | 0.170          | -0.200         |
| FEV1, % predicted (N=192)                                      | 0.023          | 0.189          | -0.225         |
| Mini-Cog total score (N=265)                                   | 0.066          | 0.062          | 0.010          |

|                                                        |          |          |           |
|--------------------------------------------------------|----------|----------|-----------|
| Hemoglobin (N=284)                                     | -0.168   | -0.114   | -0.298    |
| Platelets (N=284)                                      | -0.080   | 0.018    | 0.033     |
| Uric acid (N=276)                                      | 0.192    | -0.202   | 0.300     |
| eGFR (N=283)                                           | -0.202   | 0.146    | -0.523    |
| <b>P-value of correlation</b>                          |          |          |           |
| Age                                                    | 1.11E-02 | 9.18E-02 | 1.18E-01  |
| Left ventricular ejection fraction                     | 4.17E-03 | 1.08E-02 | 8.13E-06  |
| Left ventricular end diastolic volume index            | 1.31E-01 | 5.94E-02 | 9.11E-03  |
| Mean E/e'                                              | 1.34E-01 | 9.66E-01 | 1.17E-03  |
| Average gait speed                                     | 3.31E-01 | 2.30E-02 | 1.28E-06  |
| Average grip strength                                  | 6.03E-01 | 2.48E-02 | 7.15E-02  |
| Kansas City Cardiomyopathy Questionnaire summary score | 7.88E-01 | 5.45E-03 | 1.05E-03  |
| FEV1, % predicted                                      | 7.56E-01 | 8.69E-03 | 1.74E-03  |
| Mini-Cog total score                                   | 2.81E-01 | 3.15E-01 | 8.75E-01  |
| Hemoglobin                                             | 4.46E-03 | 5.56E-02 | 3.04E-07  |
| Platelets                                              | 1.78E-01 | 7.58E-01 | 5.81E-01  |
| Uric acid                                              | 1.34E-03 | 7.29E-04 | 3.87E-07  |
| eGFR                                                   | 6.42E-04 | 1.43E-02 | <2.20E-16 |

**Table S4: Cox models for all-cause mortality.** Hazard ratios represent risk for a 1 standard deviation increase. “Adjusted” models in the derivation and multi-center validation cohorts were adjusted for age, sex, body mass index, history of diabetes mellitus, history of coronary artery disease, history of atrial fibrillation or flutter, estimated glomerular filtration rate, high sensitivity troponin, and N-terminal pro hormone B-type natriuretic peptide. “Adjusted” models in the single-center validation cohort were adjusted for age, sex, body mass index, history of diabetes mellitus, history of coronary artery disease, history of atrial fibrillation or flutter, estimated glomerular filtration rate, and B-type natriuretic peptide. “Sensitivity” models include additional adjustments for mean aortic valve gradient and left ventricular ejection fraction. PC = principal component.

|                          |                    | Metabolite-based |                  |                       |         | Phenotype-based |        |                       |         |
|--------------------------|--------------------|------------------|------------------|-----------------------|---------|-----------------|--------|-----------------------|---------|
|                          |                    | N                | Deaths           | Hazard Ratio (95% CI) | P-value | N               | Deaths | Hazard Ratio (95% CI) | P-value |
| Derivation               | <b>Unadjusted</b>  |                  |                  |                       |         |                 |        |                       |         |
|                          | PC1                | 516              | 205              | 1.27 (1.11-1.45)      | 0.001   | 516             | 205    | 1.01 (0.88 – 1.16)    | 0.88    |
|                          | PC2                | 516              | 205              | 0.84 (0.73-0.97)      | 0.02    | 516             | 205    | 0.84 (0.73 – 0.96)    | 0.01    |
|                          | PC3                | 516              | 205              | 1.75 (1.55-1.99)      | <0.001  | 516             | 205    | 1.40 (1.22 – 1.62)    | <0.001  |
|                          | <b>Adjusted</b>    |                  |                  |                       |         |                 |        |                       |         |
|                          | PC1                | 494              | 198              | 0.98 (0.84-1.15)      | 0.81    | 494             | 198    | 0.83 (0.70 – 0.98)    | 0.02    |
|                          | PC2                | 494              | 198              | 0.94 (0.80-1.10)      | 0.42    | 494             | 198    | 0.90 (0.78 – 1.05)    | 0.18    |
|                          | PC3                | 494              | 198              | 1.54 (1.25-1.90)      | <0.001  | 494             | 198    | 1.09 (0.91 – 1.29)    | 0.34    |
|                          | <b>Sensitivity</b> |                  |                  |                       |         |                 |        |                       |         |
|                          | PC1                | 494              | 198              | 1.01 (0.86-1.19)      | 0.87    |                 |        | -                     |         |
| PC2                      | 494                | 198              | 0.95 (0.81-1.12) | 0.53                  |         |                 | -      |                       |         |
| PC3                      | 494                | 198              | 1.55 (1.26-1.92) | <0.001                |         |                 | -      |                       |         |
| Multi-center Validation  | <b>Unadjusted</b>  |                  |                  |                       |         |                 |        |                       |         |
|                          | PC1                | 282              | 121              | 1.10 (0.92-1.33)      | 0.28    |                 |        | -                     |         |
|                          | PC2                | 282              | 121              | 0.77 (0.64-0.93)      | 0.008   |                 |        | -                     |         |
|                          | PC3                | 282              | 121              | 1.58 (1.34-1.87)      | <0.001  |                 |        | -                     |         |
|                          | <b>Adjusted</b>    |                  |                  |                       |         |                 |        |                       |         |
|                          | PC1                | 274              | 116              | 0.94 (0.76-1.16)      | 0.58    |                 |        | -                     |         |
|                          | PC2                | 274              | 116              | 0.90 (0.73-1.11)      | 0.32    |                 |        | -                     |         |
| PC3                      | 274                | 116              | 1.37 (1.05-1.78) | 0.02                  |         |                 | -      |                       |         |
| Single-center Validation | <b>Unadjusted</b>  |                  |                  |                       |         |                 |        |                       |         |
|                          | PC1                | 257              | 93               | 1.17 (0.94-1.44)      | 0.16    |                 |        | -                     |         |
|                          | PC2                | 257              | 93               | 0.93 (0.76-1.13)      | 0.44    |                 |        | -                     |         |
|                          | PC3                | 257              | 93               | 1.37 (1.13-1.67)      | 0.001   |                 |        | -                     |         |
|                          | <b>Adjusted</b>    |                  |                  |                       |         |                 |        |                       |         |
|                          | PC1                | 251              | 91               | 1.11 (0.86-1.43)      | 0.43    |                 |        | -                     |         |
|                          | PC2                | 251              | 91               | 0.88 (0.72-1.09)      | 0.25    |                 |        | -                     |         |
| PC3                      | 251                | 91               | 1.43 (1.06-1.92) | 0.02                  |         |                 | -      |                       |         |

**Table S5:** Results of the "recalibrated" LASSO model using metabolites common to both internal derivation and external validation cohorts. LASSO = least absolute shrinkage and selection operator; PC = principal component.

| metabolite               | LASSO Coefficient |              |              |
|--------------------------|-------------------|--------------|--------------|
|                          | PC1               | PC2          | PC3          |
| glycine                  | 0.01494987        | 0.139102307  | 0.030239001  |
| alanine                  | -0.251512522      | -0.113791394 | 0.024166223  |
| serine                   | 0.143051865       | 0.106803934  | -0.041300673 |
| threonine                | 0.050589769       | 0.033504175  | 0.040275094  |
| methionine               | -                 | -0.05081661  | -            |
| aspartate                | 0.015995975       | -            | 0.080618582  |
| glutamate                | -                 | -0.16867989  | -0.033268046 |
| asparagine               | -                 | 0.042200172  | -0.086920091 |
| glutamine                | -0.005139735      | 0.022095756  | -            |
| histidine                | -0.069711788      | 0.074003134  | -0.332893973 |
| arginine                 | -0.030562809      | 0.212603096  | -0.016608614 |
| lysine                   | -                 | 0.041159659  | -0.001146626 |
| valine                   | -0.101041903      | 0.000266757  | -0.167696977 |
| leucine                  | -                 | 0.045187493  | -0.110701583 |
| phenylalanine            | 0.084663329       | -            | 0.048414897  |
| tyrosine                 | -                 | -0.114599243 | 0.002947603  |
| tryptophan               | 0.101032064       | -0.013813357 | -0.029229131 |
| proline                  | -0.053258912      | -0.012065449 | -0.01105175  |
| cis.trans.hydroxyproline | -                 | -            | -            |
| ornithine                | -                 | -0.068995475 | -            |
| citrulline               | 0.016689991       | 0.029839466  | 0.012033922  |
| taurine                  | 0.025119423       | -            | -            |
| 5.hydroxytryptophan      | -                 | -            | -0.017393582 |
| 5.HIAA                   | -                 | -0.006672996 | 0.042201013  |
| cystamine                | -0.062069023      | 0.013839851  | -0.001509095 |
| cysteamine               | 0.030232505       | -0.000299186 | -0.007223417 |
| GABA                     | -                 | -0.01236756  | -0.013089138 |
| dimethylglycine          | 0.017769162       | -            | -            |
| homocysteine             | -                 | -0.008340423 | -0.001346062 |
| ADMA.SDMA                | 0.010550956       | 0.052037309  | 0.166046764  |
| NMMA                     | -                 | -            | -            |
| allantoin                | -                 | 0.005085548  | 0.115265873  |

|                             |              |              |              |
|-----------------------------|--------------|--------------|--------------|
| aminoisobutyric.acid        | 0.008684823  | 0.020307994  | -            |
| carnitine                   | -            | -0.015765839 | -0.056224754 |
| 1.methylhistamine           | -            | -0.027932122 | 0.023886073  |
| 5..adenosylhomocysteine     | -            | -            | 0.01108117   |
| 3.hydroxyanthranilic.acid   | -            | -            | -0.05508892  |
| N.carbomoyl.beta.alanine    | 0.113717016  | -0.18009016  | 0.281661982  |
| niacinamide                 | -0.157019631 | 0.006085806  | -            |
| betaine                     | 0.016686918  | 0.011834496  | -0.011957004 |
| choline                     | 0.009601636  | -            | 0.006595445  |
| phosphocholine              | -0.1747666   | -            | -0.021421928 |
| alpha.glycerophosphocholine | -            | 0.037644223  | 0.005717554  |
| spermidine                  | -0.04104223  | -0.191238112 | -0.095427795 |
| creatine                    | -0.158601676 | 0.132805505  | 0.188000128  |
| creatinine                  | 0.086683549  | -            | 0.114546392  |
| adenosine                   | 0.037085836  | 0.003767399  | -0.022240968 |
| cytosine                    | -            | 0.010832363  | -            |
| xanthosine                  | 0.00130912   | -0.063711329 | 0.024627807  |
| cAMP                        | -0.060711268 | -0.034277629 | -0.001141732 |
| isoleucine                  | -            | -0.021463649 | 0.017886777  |
| xanthine                    | -0.048163564 | 0.032269234  | -0.038850884 |
| xanthurate                  | 0.11585772   | -0.095660451 | -            |
| kynurenine                  | 0.172680721  | 0.033820158  | 0.086083182  |
| uridine                     | -0.012756245 | 0.24380548   | -0.079669817 |
| citicholine                 | -0.00029907  | -0.134291446 | -            |
| beta.alanine                | -0.089808244 | -0.305192791 | -            |
| C2.carnitine                | -0.073445173 | -0.008632177 | -            |
| C3.carnitine                | -            | -            | -0.048265682 |
| C3.malonyl.carnitine        | -            | -0.067866411 | -            |
| C4.butyl.carnitines         | 0.053656022  | 0.000160457  | 0.056067457  |
| C4.methylmalonyl.carnitine  | -0.063571497 | -0.016661022 | 0.017603944  |
| C5.valeryl.carnitines       | -            | -            | -            |
| C5.glutaryl.carnitine       | 0.013413055  | -            | 0.073555365  |
| C6.carnitine                | -            | -            | 0.014374416  |
| C7.carnitine                | -            | -0.038240411 | 0.005419971  |
| C8.carnitine                | -            | 0.035161499  | -0.016166012 |
| C9.carnitine                | 0.17198752   | -            | 0.02357368   |
| C10.carnitine               | -0.03710882  | -            | -            |
| C12.carnitine               | -            | -            | 0.04619551   |
| C14.carnitine               | 0.075879056  | 0.038998555  | -0.038372988 |



|                 |              |              |              |
|-----------------|--------------|--------------|--------------|
| C16.carnitine   | -            | -            | 0.005230519  |
| C18.carnitine   | -0.034616529 | 0.024214834  | -0.081105255 |
| C18.1.carnitine | -            | -0.090844535 | 0.06323825   |
| C18.2.carnitine | 0.14104691   | -            | 0.043582665  |
| C26.carnitine   | 0.051564122  | 0.044507161  | -0.024568913 |
| anandamide      | -0.046417867 | -            | -            |
| Cystine         | -0.059824958 | -0.034687137 | -0.025504188 |

**Table S6:** Measures of multimorbidity and frailty in the derivation and multi-center validation cohort. Continuous variables are reported as median (25<sup>th</sup>, 75<sup>th</sup> percentile); % missing. Categorical variables are reported as n (%); % missing. FEV<sub>1</sub> = Forced expiratory volume in the first second.

| <b>Characteristic</b>                          | <b>Derivation<br/>N = 519</b> | <b>Multi-center Validation<br/>N = 286</b> |
|------------------------------------------------|-------------------------------|--------------------------------------------|
| Kansas City Cardiomyopathy Questionnaire Score | 47 (29, 66); 6.2%             | 46 (30, 64); 6.6%                          |
| Gait speed average (m/s)                       | 0.72 (0.55, 0.88); 12%        | 0.67 (0.51, 0.84); 21%                     |
| Grip strength average (kg)                     | 19 (14, 26); 8.5%             | 19 (13, 27); 12%                           |
| Mini-Cog total score                           | 3.00 (2.00, 5.00); 6.7%       | 3.00 (2.00, 4.00); 7.3%                    |
| Percent predicted FEV <sub>1</sub>             | 82 (67, 102); 21%             | 75 (60, 90); 33%                           |
| Hemoglobin (mg/dL)                             | 12.20 (10.90, 13.30);<br>0.6% | 12.50 (11.20, 13.72);<br>0.7%              |
| Platelets (per liter)                          | 199 (158, 244); 0.8%          | 190 (156, 239); 0.7%                       |
| Uric acid (mg/dL)                              | 6.30 (5.00, 7.70); 2.9%       | 6.30 (5.10, 8.00); 3.5%                    |

**Figure S1: CONSORT diagram**

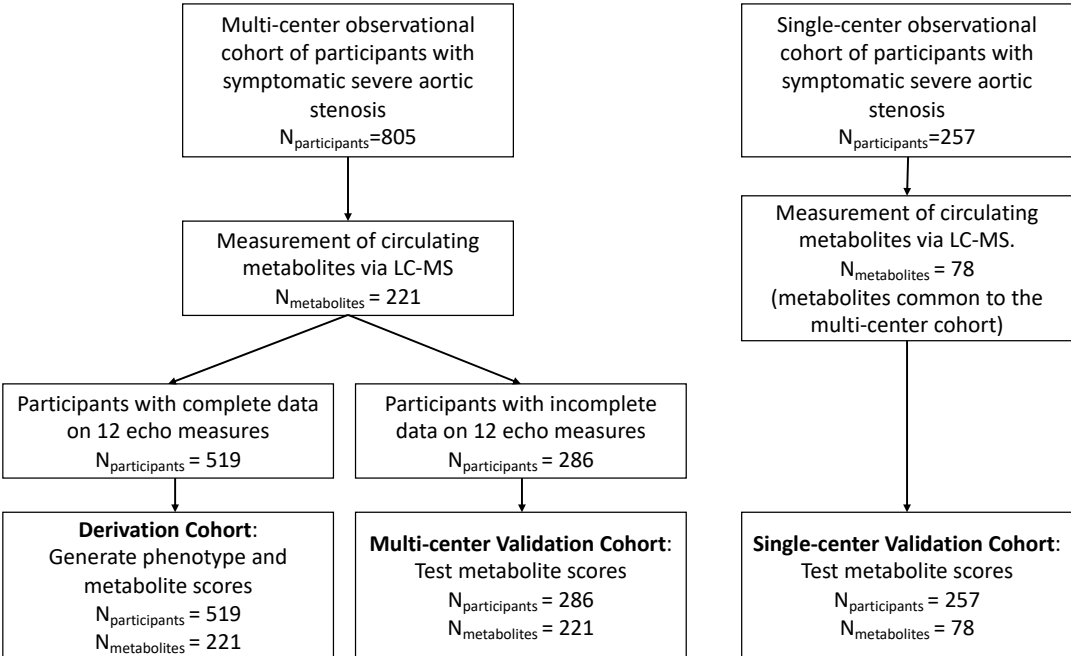

LC-MS = liquid chromatography – mass spectrometry

**Figure S2: Correlation of echocardiographic parameters**

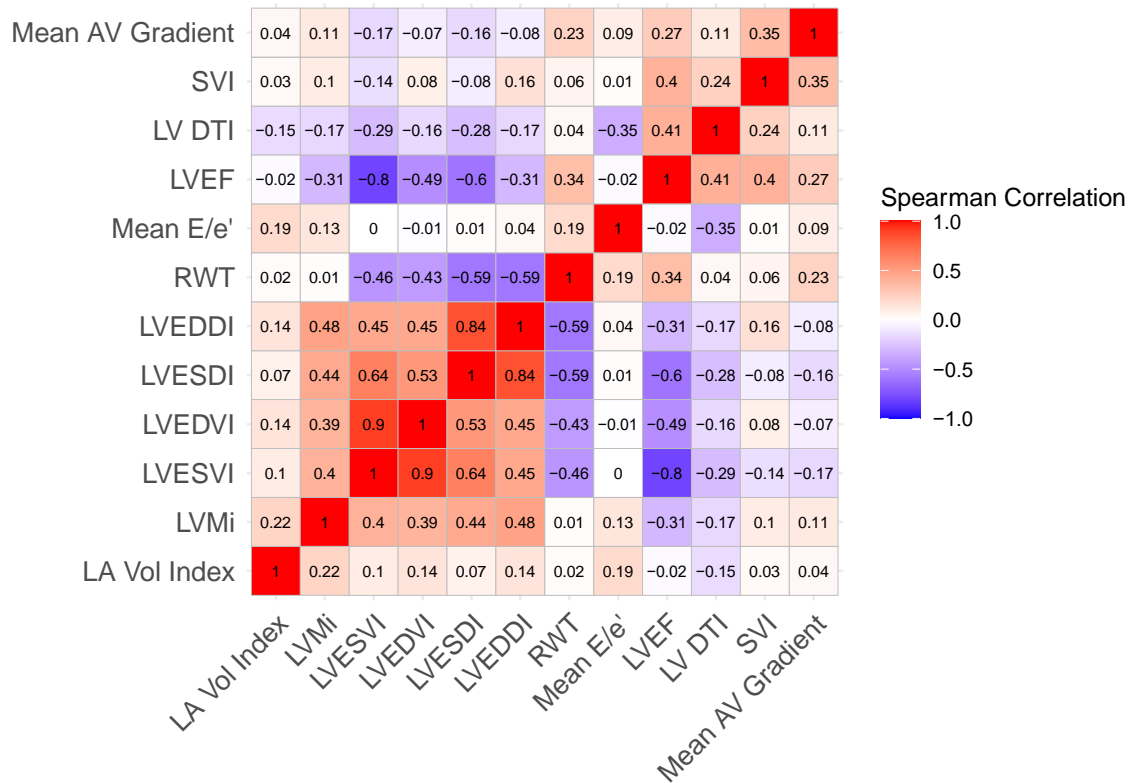

Spearman correlation across 12 echocardiographic parameters used in principal components analysis. LA Vol = left atrium volume index; LVMi = left ventricular mass index; LVESVI = left ventricular end-systolic volume index; LVEDVI = left ventricular end-diastolic volume index; LVESDI = left ventricular end-systolic diameter index; LVEDDI = left ventricular end-diastolic diameter index; RWT = relative wall thickness; LVEF = left ventricular ejection fraction; LV DTI = tissue Doppler S velocity of lateral mitral annulus; SVI = stroke volume index; AV = aortic valve.

**Figure S3: Scree plot from principal components analysis**

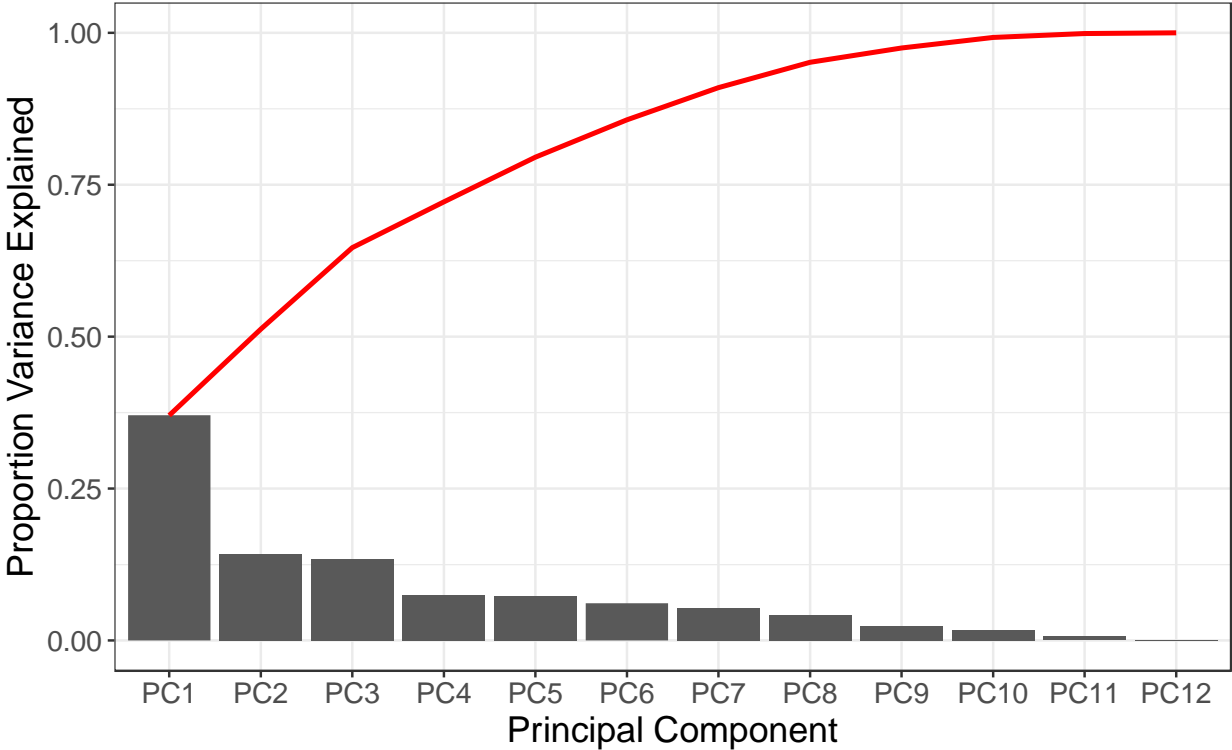

Scree plot demonstrating proportion of variance explained (bars) and cumulative variance explained (red line), suggesting 3 principal components. PC = principal component.

**Figure S4: Relationship between circulating metabolites and echocardiographic PCs.**

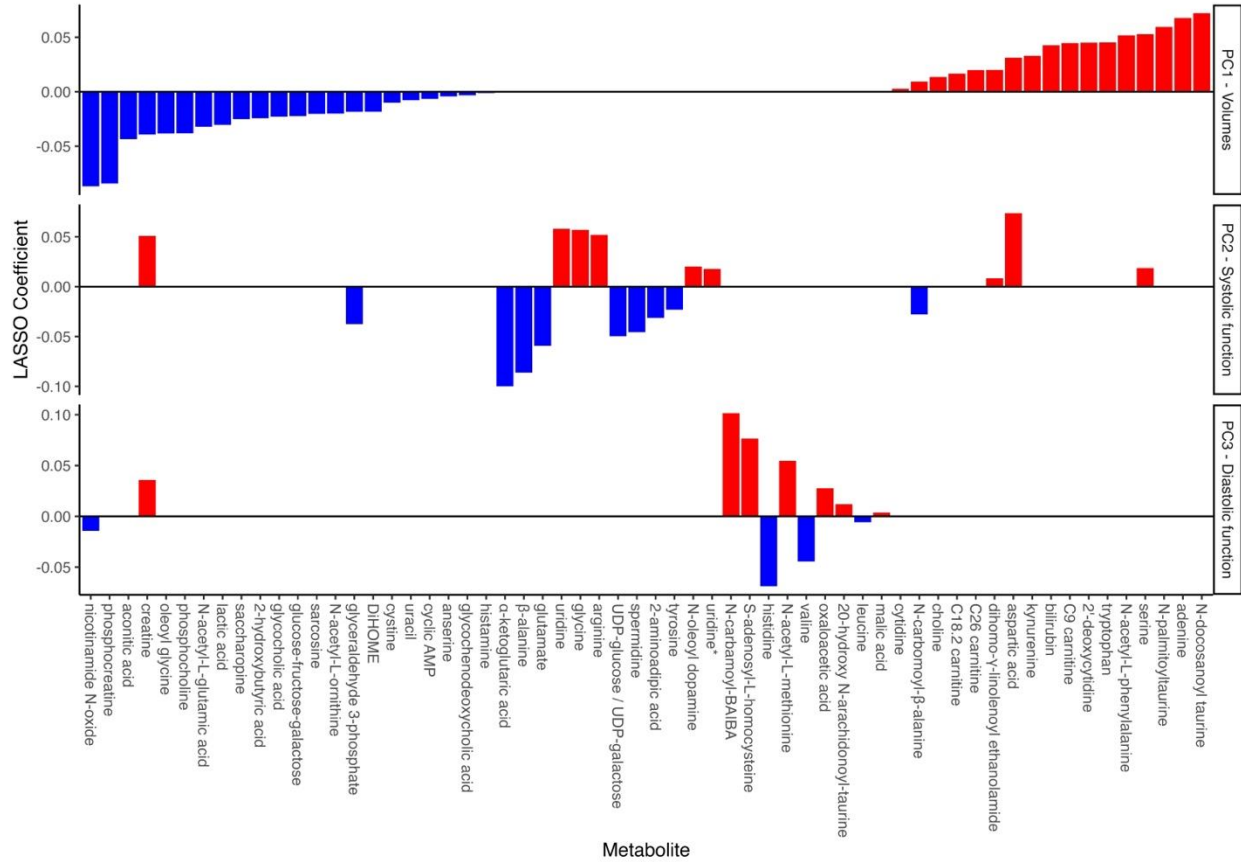

All 60 metabolites selected by LASSO are shown with their corresponding loading with each echocardiographic PC (see **Table S1** for coefficients). LASSO = least absolute shrinkage and selection operator; PC = principal component. \*HILIC negative ion mode.

**Figure S5: Relation of metabolite scores to parent phenotypes**

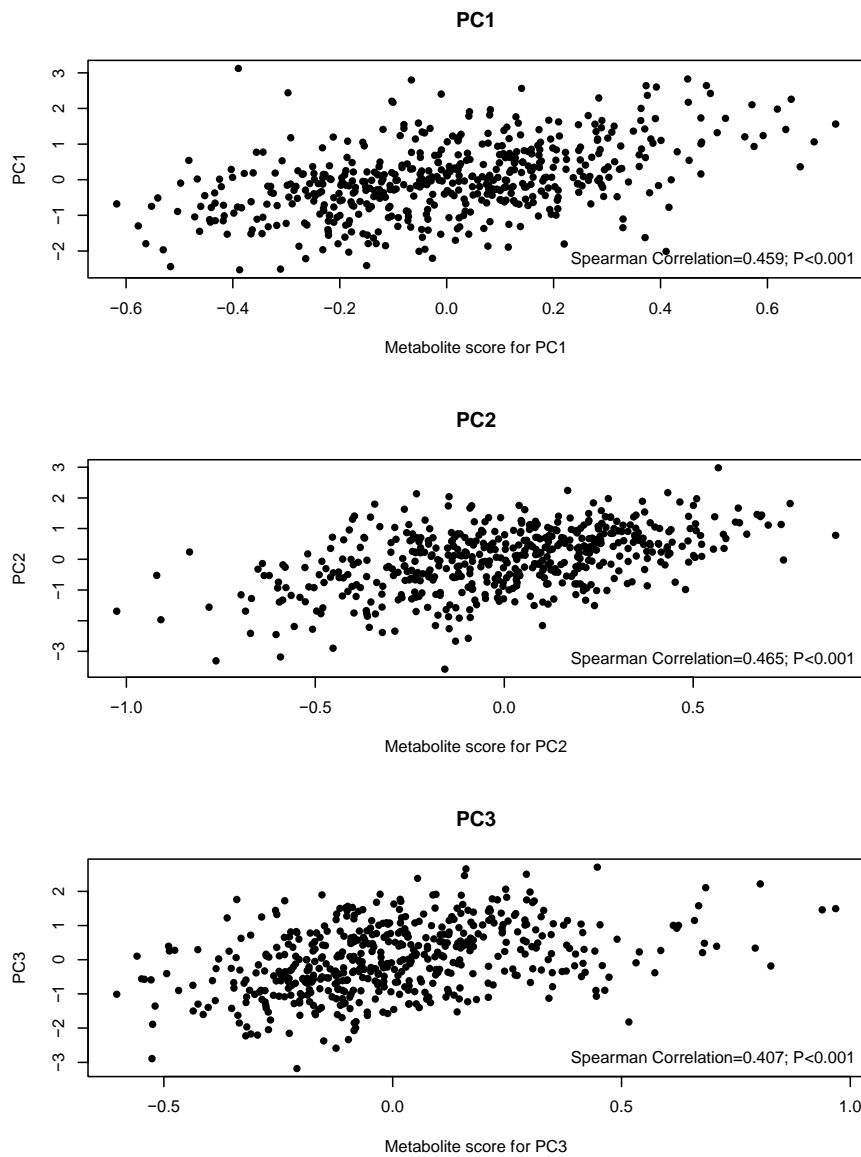

Relation of parent phenotype PC scores with metabolite scores. The associations were moderate in magnitude. Reported  $R^2$  is from model optimization at the optimal lambda. PC = principal component.

**Figure S6: Comparison of metabolite scores across sex.**

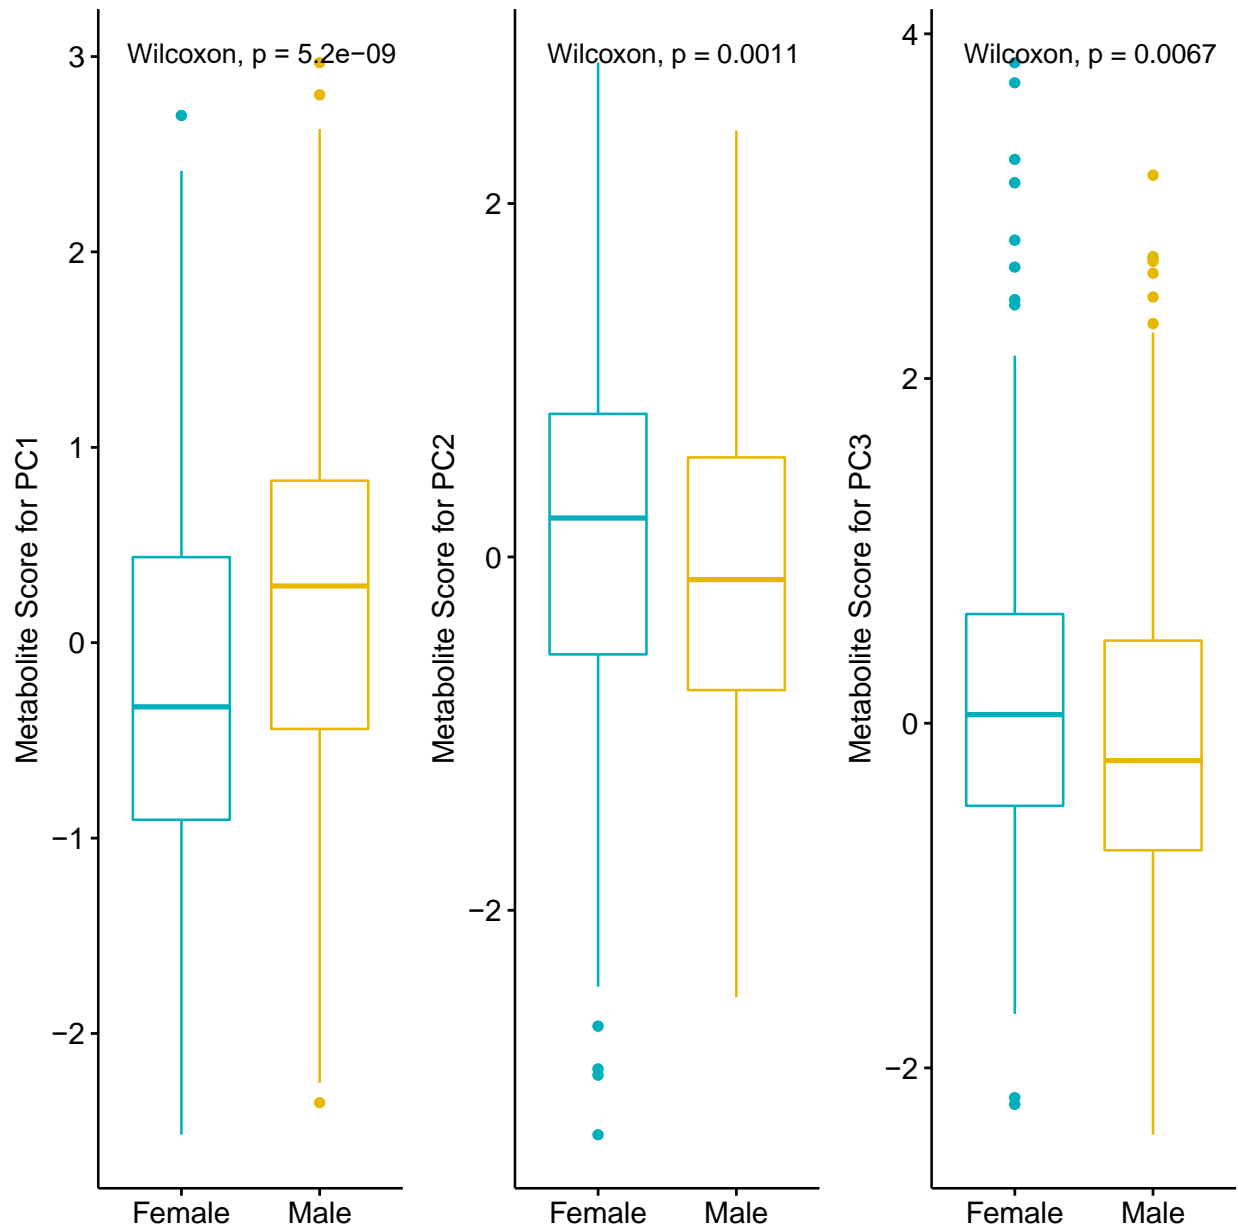

Box-plots for metabolite scores across sex (comparison by Wilcoxon test). While we observed statistically significant differences by sex, there was a broad degree of overlap suggesting no clinically meaningful differences in metabolite score by sex. PC = principal component.



**Figure S7: Pathway analysis of metabolite scores**

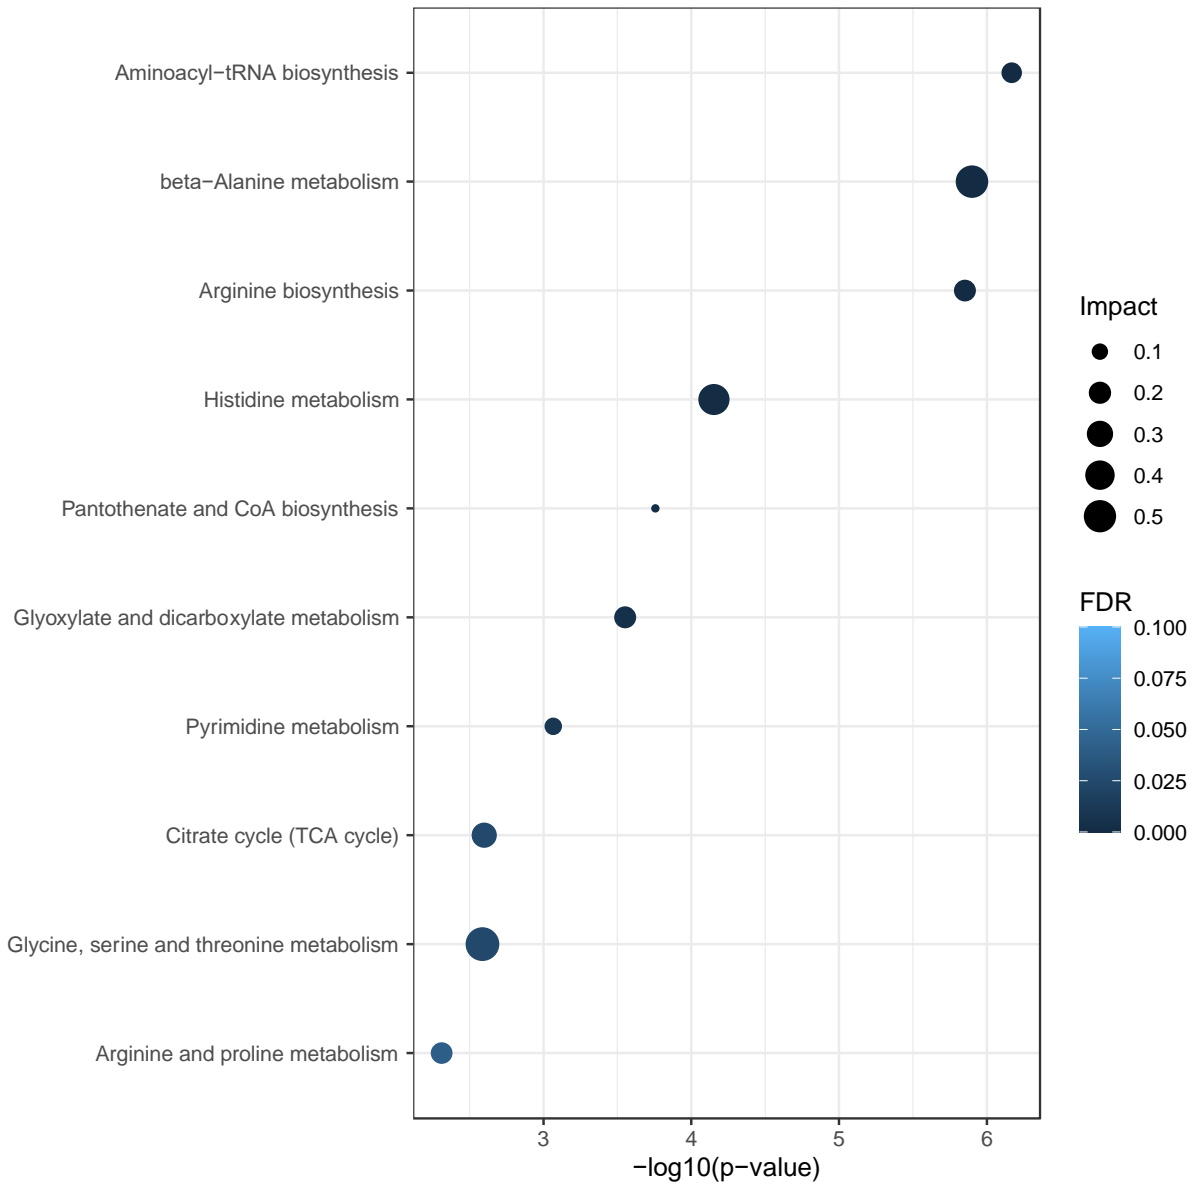

Metabolic pathway analysis of 52 metabolites with Human Metabolome Database (HMDB) identifiers (out of 60 metabolites across all identified metabolite scores).

Pathways with an FDR < 0.05 are shown. FDR = false discovery rate.

**Figure S8: Correlation of recalibrated metabolite scores with original metabolite scores**

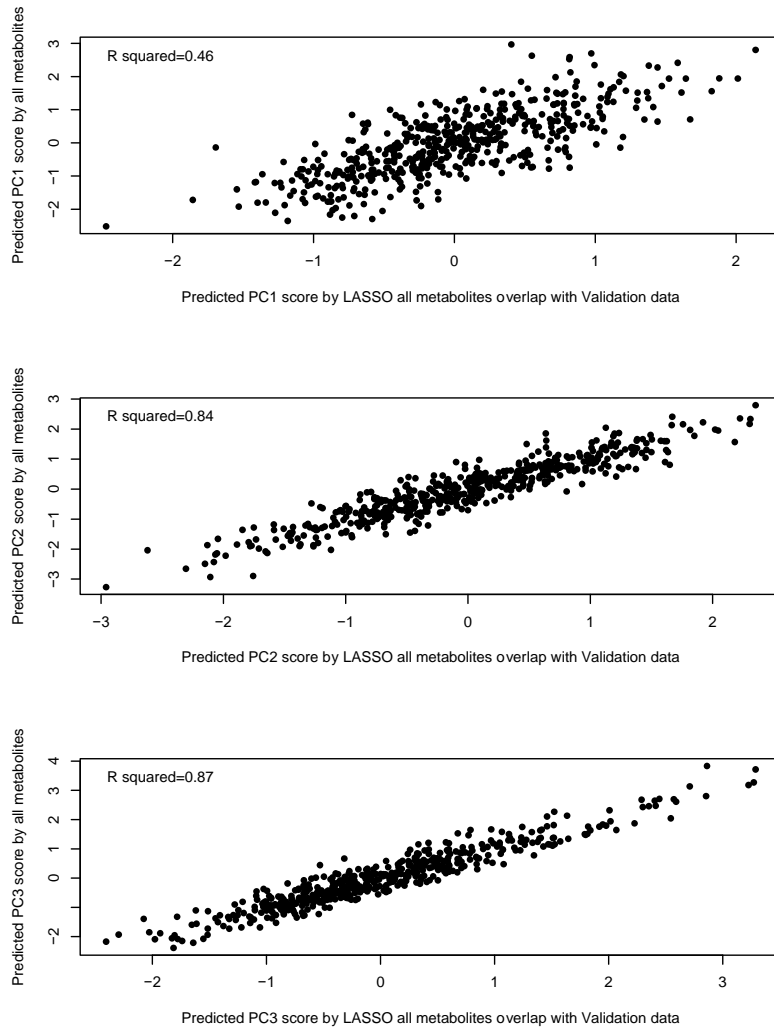

Recalibration of scores for the single-center validation cohort (as described in **Methods** and **Results**). Axes correspond to the full score (Y axis; based on all metabolites in our derivation sample) versus the recalibrated “reduced” score (X-axis; based on metabolites that overlap between the multi-center derivation cohort and the single-center validation cohort).  $R^2$  is moderate to excellent (up to 87% for PC3). PC = principal component.

**Figure S9: Validation of the prognostic utility of the metabolite score for PC3 in separate cohorts.**

**Figure S9A**

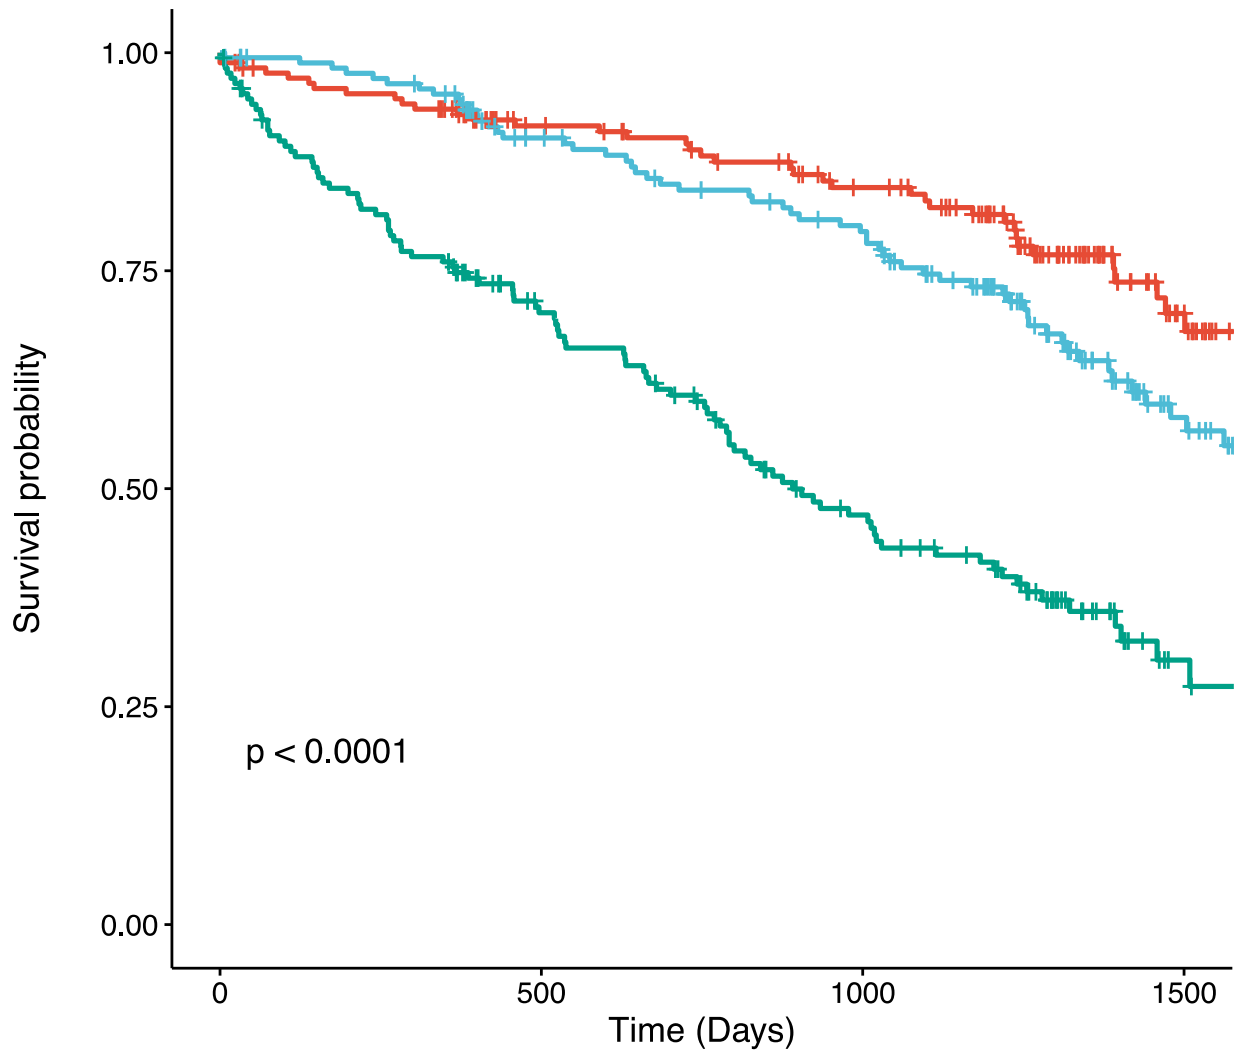

| Metabolite-PC3 Score | Number at risk |     |      |      |
|----------------------|----------------|-----|------|------|
|                      | 0              | 500 | 1000 | 1500 |
| Tertile 1            | 173            | 136 | 113  | 35   |
| Tertile 2            | 172            | 138 | 116  | 38   |
| Tertile 3            | 171            | 104 | 62   | 10   |

Time (Days)

Figure S9B

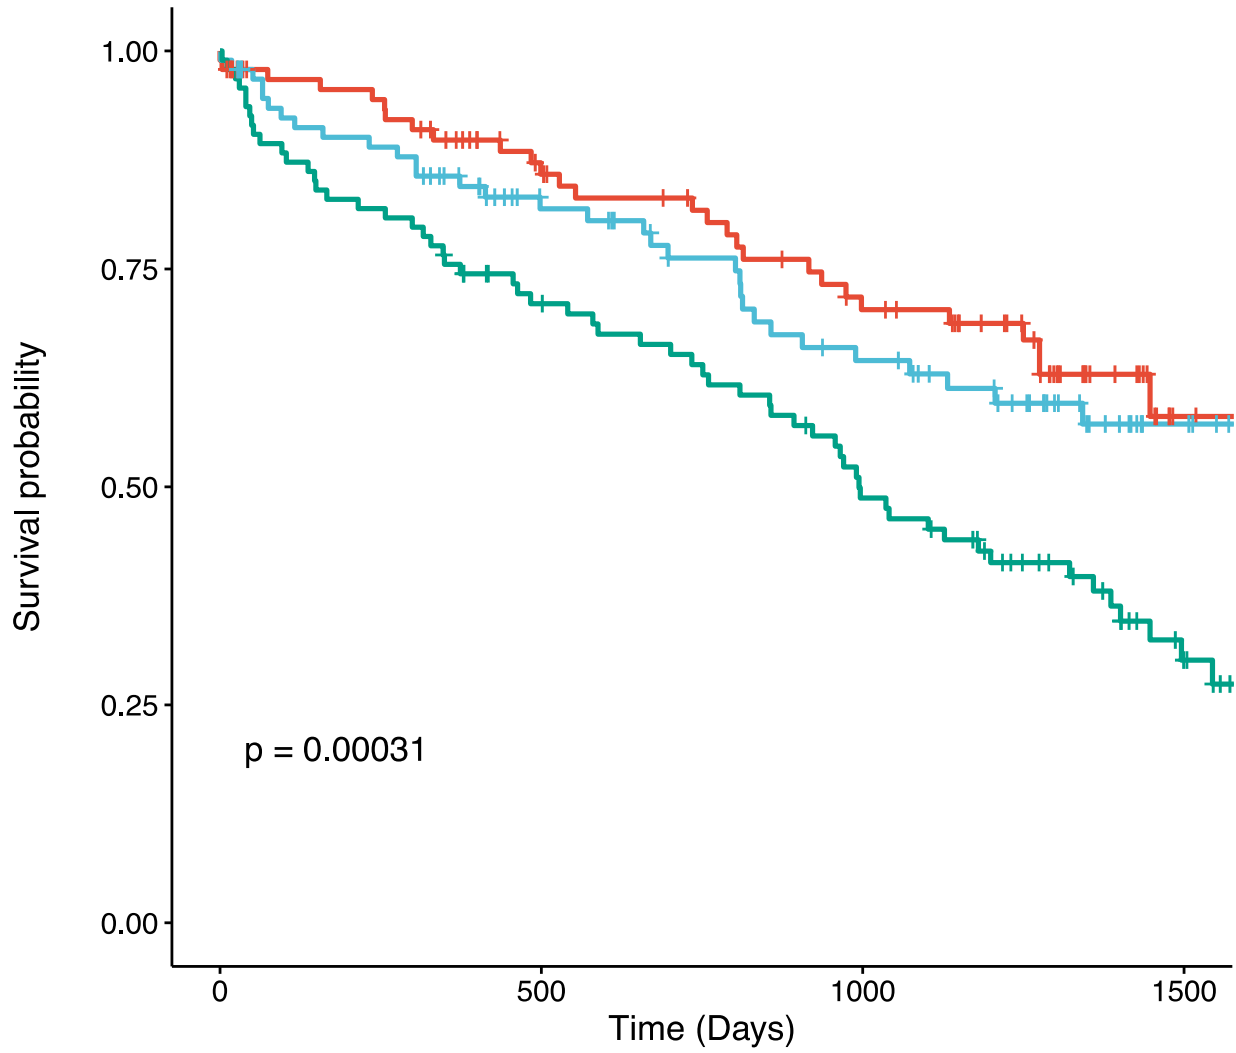

Metabolite-PC3 Score

|           | Number at risk |     |      |      |
|-----------|----------------|-----|------|------|
|           | 0              | 500 | 1000 | 1500 |
| Tertile 1 | 94             | 65  | 48   | 7    |
| Tertile 2 | 94             | 61  | 43   | 15   |
| Tertile 3 | 94             | 62  | 41   | 12   |

Time (Days)

Figure S9C

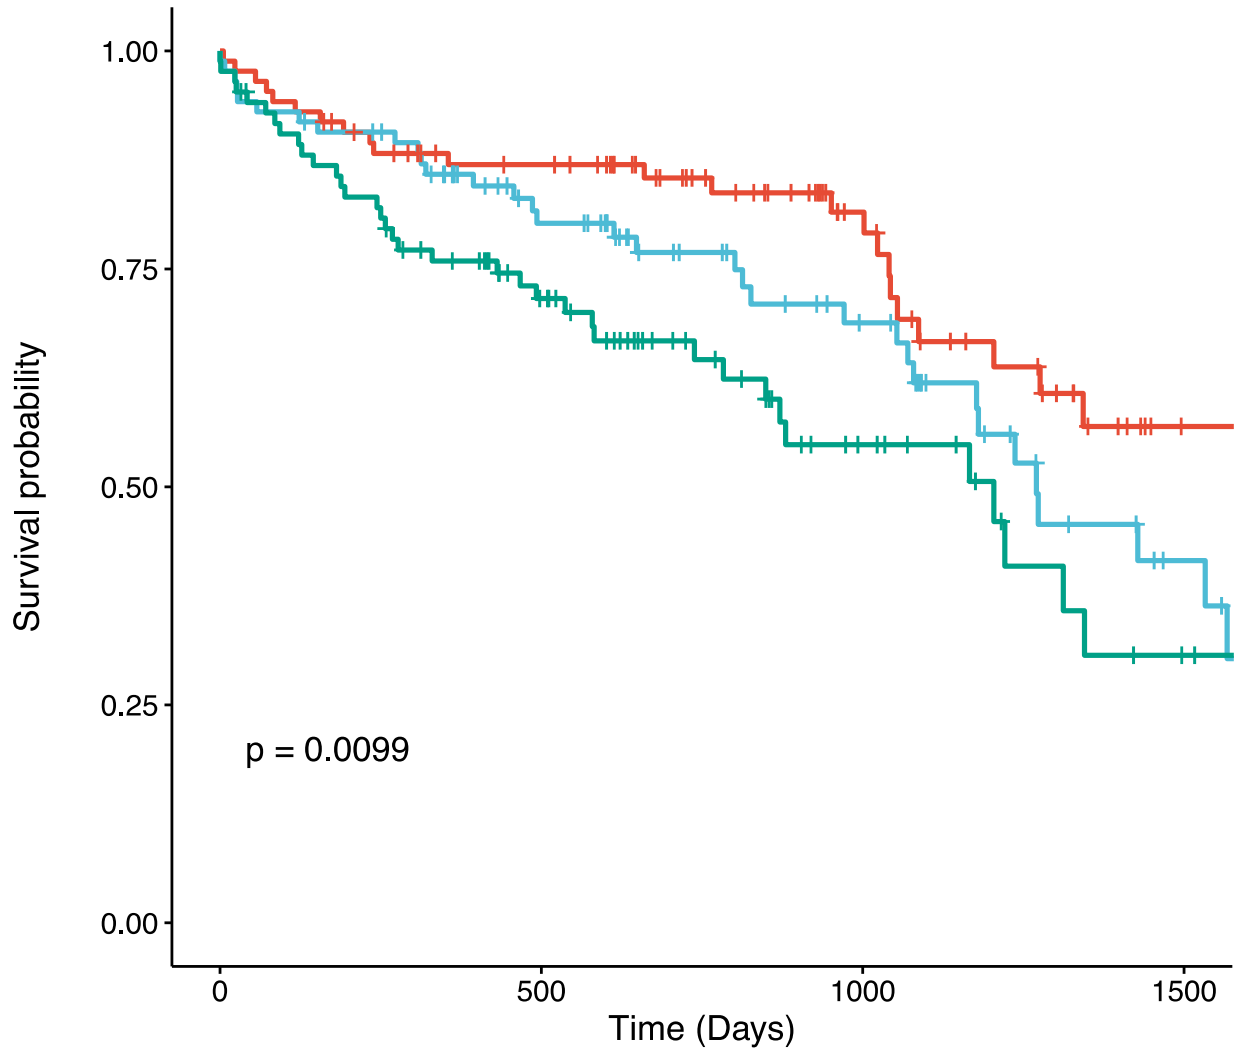

Metabolite-PC3 Score

|           | Number at risk |     |      |      |
|-----------|----------------|-----|------|------|
|           | 0              | 500 | 1000 | 1500 |
| Tertile 1 | 86             | 66  | 34   | 7    |
| Tertile 2 | 86             | 56  | 31   | 8    |
| Tertile 3 | 85             | 48  | 17   | 4    |

Time (Days)

Kaplan-Meier estimates of survival among the multi-center derivation cohort (A), multi-center validation cohort (B), and single-center validation cohort (C) stratified by tertiles of PC3 metabolite score. For visualization plots are truncated at 1500 days. P-values from logrank tests are reported. PC = principal component.
